# Supplementary material for: De Novo Sequencing and Transcriptome Analysis of the Central Nervous System of Mollusc Lymnaea stagnalis by Deep RNA Sequencing
Source: PubMed Central journal article supplement (PMC3411651; doi:10.1371/journal.pone.0042546), 2012-08-01

**A**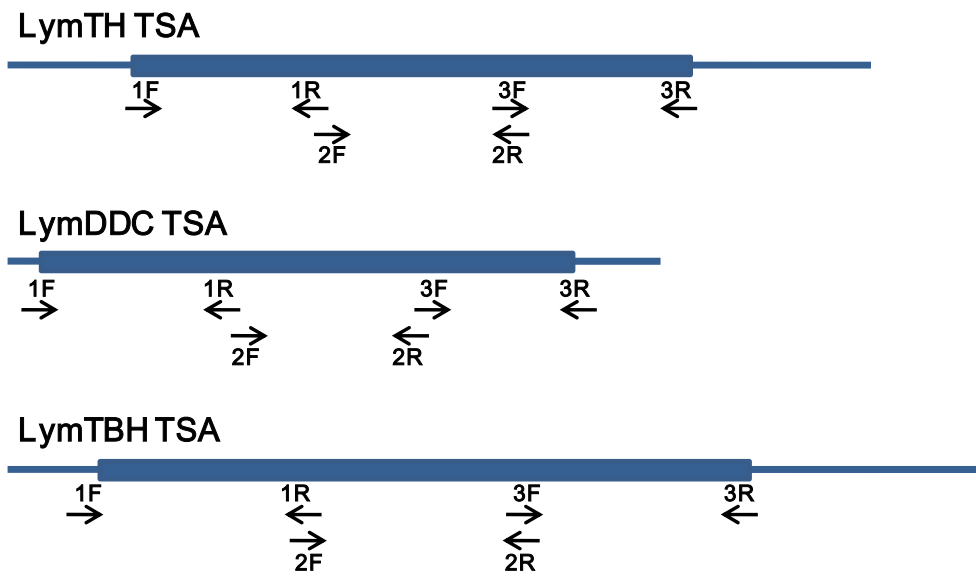**B**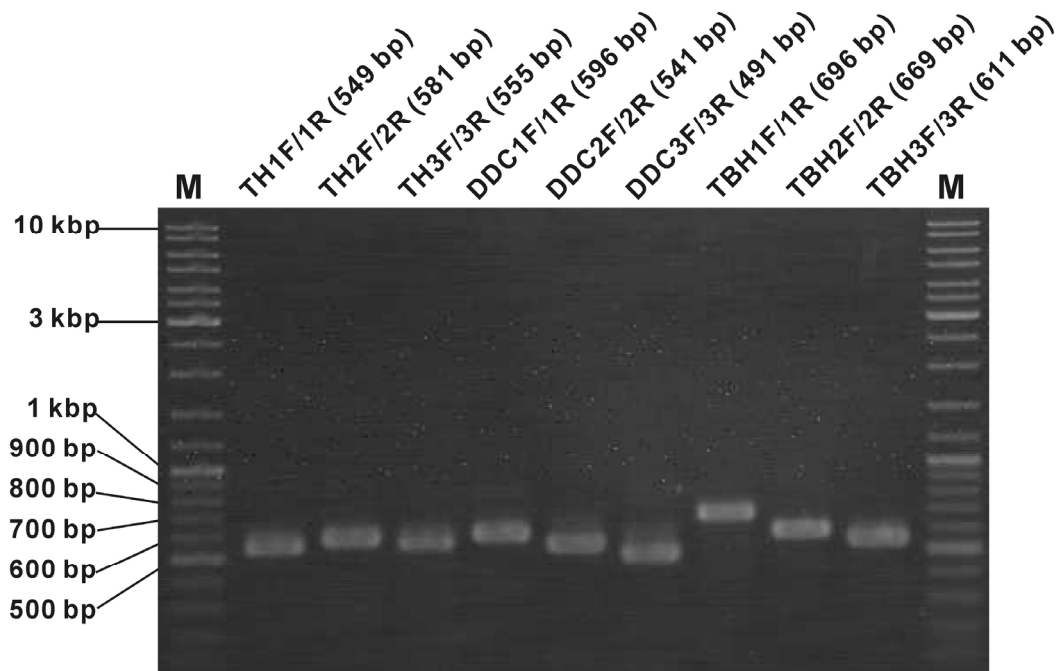

Supplement: pone.0042546.s001.pdf [file pone.0042546.s001.pdf]
