# Supplementary material for: De Novo Sequencing and Transcriptome Analysis of the Central Nervous System of Mollusc Lymnaea stagnalis by Deep RNA Sequencing
Source: PubMed Central journal article supplement (PMC3411651; doi:10.1371/journal.pone.0042546), 2012-08-01
Supplement: pone.0042546.s002.pdf [file pone.0042546.s002.pdf]

# LymTH

**cDNA** ATGAACGGGATTCCGGACGTCAACGAAACAGCCAAGCGACGGCTTGCATTTCAAAAAGCTTTCAGCCAAGAGCACGGTGG 80  
**TSA** ..... 80

GTGGCGCAAGAAGAGCTTAATAGCAGACGCCAAGTTCGAGACAGCCGCAACAAGGAGTTCAAGAAACAGGAGCGGCGCC 160  
..... 160

TCAGCAAAACAGACTCTGTCAGCGACGAGGAAGGATTGCCCCCTGGGCTTTTACCGGACGCCTTCCCGGAGGATTACGCC 240  
..... 240

GCCTTCAACCTCCTGGTACTCTCAGGGAGGGAGCCATCAGCTTGGCCAAGGTGATCCGATGTTTTGAGAATGGCAAAGT 320  
..... 320

GTTTCATCACCACGTGGAGTCTCGTAAGGCGCTCTCAGATCTAAAGCAGTACCAGCTCTTCCTGCAGGTCGTCTGCACGC 400  
..... 400

ACGAGACGTTTCGACAACGTCTGCGGTGCTGCCAGGCAAAGTCCACTCATTTTCGGATCTCAAAGTGTGGAGGAAAAGGAG 480  
..... 480

CCAGAGAAAAAAGACATTTGGTTTCCCAAAACACATCAGTGACCTGGACAAGTGTACACACCTCATTACAAGGTTTGAACC 560  
..... 560

AGATTTAGACTACACACATCCAGGTTTTGCTGACAAAACCTATAGATTGAGAAGAAAAGAAATCGCTGACATTGCCTTTG 640  
..... C..... C..... 640

GTTACCGATGCGGACAAGCCATTCCCAGAGTGGAGTACACAGAAGAAGAGAACGCAACCTGGGCCACGTGTATCGTCAT 720  
..... G..... 720

CTCAAGGACCTGTTCCCGACCCACGCCGCAAGGAGCACATCGACGCTTCAAGTTGCTGGAGATGGAGGGCGGGTTTTG 800  
..... T..... 800

CGAGGAGAAGATCCCCAGCTGGAGGATGTCTCAAACCTTCTCAAACGTAAGACTGGGTTTCAGCTCCGTCCGGTGGCCG 880  
..... A..... 880

GTCTACTCTCAGCCGAGACTTCTGGCATCCCTGGCGTTCAGAACCTTCCAGTGCACACAATACGTCAAGCAGGGGCC 960  
..... 960

AAGCCGGATCACTCGCCTGAGCCAGACTGCATCCACGAGTTACTCGGACACGTCCCATGTTGGCTGACCCGAAGTTCGC 1040  
..... 1040

CCAGTTCGCCCAGGAGTTGGGGCTGGCCACTCTCGGTGTGTCGGACGAGAACATTGAGAAGTTCGCGACGTTATTTTGGT 1120  
..... 1120

TCACTGTTGAGTTCGGCCTCTGCAAACAAAACGGCGAGCTGAGGGCGTACGGGGCCGGCATGCTCTCCTACGGGGAG 1200  
..... 1200

CTACAGAACAGCCTCAGTGGGGCGCCACGGTGAAAGAGTTCGACCCTATGGTGACGGCGGTTTCAGGAGTACAAGGACGA 1280  
..... 1280

CGACTTCCAGCCATCCTGTTTGTGCTGGAGTCGTTTGGAGACATGATGACCAAGATGAGACAATACGTGCCAGCATTG 1360  
..... 1360

ACCGAGAGTTCGACCTGAGTTACGACCCCTACACGCAGTCCGTCAAGATCCTGGACCACAATTCTGCACTGGAGGAGGTG 1440  
..... 1440

GCCGGTGGGCTGCAGCACGACGTCAACATGCTGGTCCACGTGATGAACAGGTTCAACAGGCCGGTCTAG 1509  
..... 1509
