# Supplementary material for: De Novo Sequencing and Transcriptome Analysis of the Central Nervous System of Mollusc Lymnaea stagnalis by Deep RNA Sequencing
Source: PubMed Central journal article supplement (PMC3411651; doi:10.1371/journal.pone.0042546), 2012-08-01
Supplement: pone.0042546.s003.pdf [file pone.0042546.s003.pdf]

# LymDDC

**cDNA** ATGGACGCTCAAGAATTCCGTGCCAGGGGTCGCGAGATGGTCGACTACGTCGCTGACTACCTGGAGACCATCGGCACCCG 80  
**TSA** ..... 80

CACTCCACTCCCTTCAGTCTTGCCCTGGCTACCTGAGGGAGCTGATCCCAGACGAGGCGCCCTGAATGGGGAGTCCCTGGG 160  
.....G..... 160

AGGAGGTGAAAAAAGATATTGACAGGGTCATCATGCCAGGGGTCACCCACTGGCACAGCCACAGTTCCATGCATACTTC 240  
..... 240

CCCACCTCCAGCTCTTACCCTGCCATTCTGGGGGACATGCTGTCTGACGGCATCGGGTGTATCGGATTCAGTGGCCAGC 320  
..... 320

AAGCCCCGCATGCACTGAGCTAGAAGTCTCCATGATGGACTGGTTGGCCAAGATGTTAAACCTGCCCAAGAGTTTCTGT 400  
..... 400

TTAGTGGGGGAGAAAAGGTGGAGGTGTTATACAGGGCACAGCAAGTGAGGCAACTCTGTAGCACTCCTGTGGCTAGG 480  
..... 480

ACCACCATGATTAATAAGCTCAAGAAAAGACAACCCCCAAATGACCCAAGGGCAGATCGTTGATAAACTGGTGGCTTATTG 560  
..... 560

TTCAGAAGAGGCCCATTCATCAGTTGTTAGAGCCTCACTTATCGGCATGGTACAAATGAAATCTCTACCAACAGACGACA 640  
..... 640

AAGGATCCCTGAGAGGCTCGGAGCTAGAATCTGCCATCATTAAGGACAAGGAGCAAGGCTTGATACCTTTCTTTCTGTGT 720  
..... 720

GCAACTGTAGGGACCACATCCACATGTGGCACAGATAATTTGCTAGAACTGGACCGATTTGTAAACAAACATGACATCTG 800  
..... 800

GATGCATGTTGACGCCGCCTATGCCGGAAGTGCTTTTCATATGTCTGAGTTCAGACCTCTGCTGGATGGTGTGGAGCATT 880  
..... 880

CCATGCTTTCAATTTCAACCCCCACAAATGGCTGCAGGTGACCTTTGACTGTTTCAGCATTGTGGGTCAAGGACAGTGGT 960  
..... 960

CTGGTATCTGGGGCGTTTGAGTTGAACCCCGTTTACCTTAATCATGACAACCAGGGACAAGCCATGCCCGACTATAGACA 1040  
..... 1040

CTGGCAGATCCGTTGGGCAGGAGGTTCCGGTCTCTAAACTCTGGTTTGTTCTACGCATGTTTGGCGTACAGGACTCC 1120  
..... 1120

AGGAACAAATAAGGAAGGATGTATCCCTTGCTCATCAGTTTGAAGGACCTAGTTAAGAGTGATGACAGGTTTGAAATAGTC 1200  
..... 1200

AGAAAGGTGACCTTTGGCCTTGTTTGCTTTAGGTTAAAGGGGACCAATGAAATCAATGAAACACTTACAAAGAAAATAAA 1280  
..... 1280

CGATGACCGAAGGATCCACCTGACCCCATCCAAGGTCAAGGACACATTCTTTTACGATTTGCCGTGTGCGCCACAAAGA 1360  
..... 1360

CCCAGTTTCTGACGTTAAATTTGCTTGGACGGTTATACAAGAGCTGACCGACAGTTTGTGTCCAGTCCAAAGTAG 1437  
..... 1437
