# Supplementary material for: De Novo Sequencing and Transcriptome Analysis of the Central Nervous System of Mollusc Lymnaea stagnalis by Deep RNA Sequencing
Source: PubMed Central journal article supplement (PMC3411651; doi:10.1371/journal.pone.0042546), 2012-08-01
Supplement: pone.0042546.s004.pdf [file pone.0042546.s004.pdf]

# LymTBH

**cDNA** ATGGATGGACACGCTTGGTCGATCTCGGCTGTCGCTGGCTCGTGGTTCTCTCGGCTGACCACTCGGTTCAAGCGTATCA 80  
**TSA** ..... 80

GTATCAAGTGACCCTAGACCCCGACAGCAGGTACCTGTTCCAGTGGTCAGTGGACTACAAGGAAAGTCTTATCAATGTCC 160  
..... 160

AGCTCACGTGCAAGGTCACGCCAGAGAGCTGGCTTGCTTTTGGATTCTCGGACTACGGTGACGTCACCTTCCGCTGACCTA 240  
..... 240

ATCTTGTTTTGGACAGACGGTGATGGCAAGCACCATTTCTTCGATGGTCACACGACACCGGATGGGATATTTCTACCTGA 320  
..... 320

CCGGCAACAGGACTACCATCTGACATCAGTCGCCGATGACCGTGGGTGAGTTGTGCTGGATTTCTACAGGCACTTCAACA 400  
..... 400

CATGCGACCCAGAGGACTACGCCCTGGACAACGGCACCACGCATCTCGTGTACGTAGAGTCGGCGCAGCCCGAGGGCCCG 480  
..... 480

CCCCTCGCCCGTGACGTCACGCGACTACGTCACGGGGTCCAACGCCCTGCAGCTGTTAAAACCCGAGATTTCCGCCCCAGT 560  
..... 560

GTTCGCCGAGGACACGTGGTCGTTTTGAGGTCAGGGCGCCAGAGGTGTTGGTGCCAGCCGAGGAGACGACCTACTGTTGGC 640  
..... 640

ACACTACCATCTTACCGGACATGCCATCACCCACCACATCATAACAGTACGAGGGGATCGTGCCGAGGGAAGCGGTGAC 720  
..... 720

CTCGTCCACCACATGGAAGTCTTCCACTGTCAGGTCCAAAAGGTCACGGCGTCCCGTACTACAATGGGCCCGGCATAGC 800  
..... 800

TGAAGGGAAGCCCGAAGGCCCTGGAGGTGTGCAGGAAGGTCATCGGCCGTTGGGCCATGGGGCGGAGGCGATGATATACC 880  
..... 880

CCGAGGAGGCAGGGGTCCCCGTGGGAGGCCAGGGGTTCTCGCGCTTTGCCTTGCTTGAGGTCCACTACAACAACCCACAG 960  
..... 960

AAGAAATCTGGTCGAATGGACTCGTCCGGGATCCGCTTCCACGTGACGTCACAACCTCCGGAAGTATGACGCGGGGATCAT 1040  
..... 1040

GGAGCTCGGACTGGAGTACGTCAACAAGATGGCCGTGCCGCCCGACAGCGGGACTTCAAGCTGAGCGGTTACTGCGTAC 1120  
..... 1120

ACAAATGTACACAAATGAGCTTACCACCTGCCGGCATCCACGTGTTCCGCTCCAGCTCCACACTCACCTGACGGGGCGC 1200  
..... 1200

CGCGTGTACACCAAGCACGCGCGGGATGGCGCGGAGCTTCCGGAAGTCAACCGGGACAACCACTACAGCCCCACTTCCA 1280  
..... 1280

GGAGATCAGGAGGCTGCCGACGCCGACCACGTCTCCCGGGCAGCTGCTGATAACCACGTCGAGTACGACACAACGA 1360  
..... 1360

AGAGGTCAAAGGCTACAGTTGGCGGCTTCTCCATAACAGATGAGATGTGTCTCAACTACGTCCACTACTACCCAGGTCT 1440  
..... 1440

GACCTTGAAGTCTGCAAGAGCTCAGTCAGGACTGATTGCTTCCACATTTTTCTTTTTGCTCAACAGATTGAGAATTC 1520  
..... 1520

AAAGGTGCTCCAGAGCGGGTGACAGGGCAAACATGAAAGCATTGAGTGGTCTCCCCTGAATGTCCGGCTCCTGGAGG 1600  
..... 1600

ATCTGTACAGCACCTCGCCGCTCTCCATGCAGTGCAACAGGTCAGACGGCACCCGGTCCCGGGCAGTGGGAGCACGTT 1680  
..... 1680

CGAGTCCCAGACATTGTCCGACCGTTGGTTGTGGACACGTCAGAAGTTTGTCTCGGGCCACGTCACAGCGGAATAG 1755  
..... 1755
